# Supplementary material
Source: PubMed Central journal article supplement (PMC3482859)
Supplement: supp_blood-2012-02-412643_blood-2012-02-412643-1.pdf [file supp_blood-2012-02-412643_blood-2012-02-412643-1.pdf]

| Patient numbers | Diagnosis | Sample Type | Tumor Cells % of lymphocytes | Patient Age, yrs | White Blood Count, per uL | Lymphocytes % | Neutrophils % | Metaphase % | Blasts % | Monocytes % | Growth Factor Information |
|-----------------|-----------|-------------|------------------------------|------------------|---------------------------|---------------|---------------|-------------|----------|-------------|---------------------------|
| 1               | MCL       | AS          | 97                           | 74               | 213,000                   | 99            | 1             | 0           | 0        | 0           | None                      |
| 2 <sup>§</sup>  | MCL       | PB          | 80                           | 54               | 79,000                    | 75            | 21            | 0           | 0        | 4           | None                      |
| 3 <sup>§</sup>  | MCL       | PB          | 80                           | 54               | 53,000                    | 77            | 22            | 0           | 0        | 1           | None                      |
| 4*              | MCL       | PB          | 0                            | 53               | 58,000                    | 1             | 86            | 7           | 1        | 1           | Neupogen                  |
| 5               | MCL       | AS          | 90                           | 75               | 67,700                    | 94            | 6             | 0           | 0        | 0           | None                      |

**Table S1. MCL patient characteristics.**

<sup>§</sup>Samples 2 and 3 are from the same patient but obtained on different days.

\*This patient had stage IV disease but was in remission when the blood samples were collected. Therefore, this sample served as normal PBMCs.

AS, apheresis sample; PB, peripheral blood.

|   | Primary Antibody Names     | Company Information                      |    | Primary Antibody Names    | Company Information                         |
|---|----------------------------|------------------------------------------|----|---------------------------|---------------------------------------------|
| 1 | Pim-1 (clone 12H8)         | Santa Cruz Biotechnology, Santa Cruz, CA | 10 | Total Bad                 | Cell Signaling Technology                   |
| 2 | Pim-2                      | Signal-Aldrich, St. Louis, MO            | 11 | Phospho-Bad (Ser112)      | Cell Signaling Technology                   |
| 3 | Pim-3                      | Abgent, San Diego, CA                    | 12 | Total 4E-BP1              | Santa Cruz Biotechnology                    |
| 4 | GAPDH                      | Cell Signaling Technology, Beverly, MA   | 13 | Phospho-4E-BP1 (Thr37/46) | Cell Signaling Technology                   |
| 5 | PARP                       | BD Biosciences, Franklin Lakes, NJ       | 14 | Mcl-1                     | Santa Cruz Biotechnology                    |
| 6 | Total c-Myc (clone C33)    | Santa Cruz Biotechnology                 | 15 | Bcl-2                     | Dako, Carpinteria, CA                       |
| 7 | Phospho-c-Myc (Ser62)      | Abcam, Cambridge, MA                     | 16 | Bcl-X <sub>L</sub>        | BD Transduction Laboratories, Lexington, KY |
| 8 | Total Histone H3           | Cell Signaling Technology                | 17 | XIAP                      | BD Transduction Laboratories                |
| 9 | Phospho-Histone H3 (Ser10) | Millipore, Billerica, MA                 | 18 | Cyclin D1                 | Santa Cruz Biotechnology                    |

**Table S2. Primary antibodies used in immunoblot analyses and their sources.**

| <b>MCL samples,<br/>number positive for kinase/number analyzed</b> |              |              |
|--------------------------------------------------------------------|--------------|--------------|
| <b>Pim-1</b>                                                       | <b>Pm-2</b>  | <b>Pim-3</b> |
| <b>11/12</b>                                                       | <b>11/12</b> | <b>11/12</b> |

**Table S3. Reactivities for Pim-1, Pim-2 and Pim-3 detected in MCL patient tissue array.**

Immunohistochemical staining performed in 12 MCL patient samples and data presented as positive for number positive for kinase/total number analyzed.

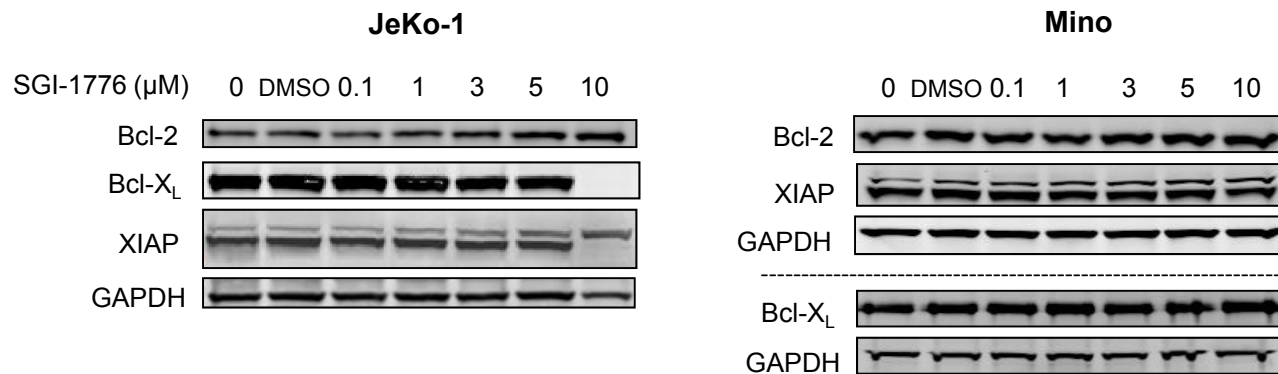

**Figure S1. Effects of SGI-1776 on anti-apoptotic proteins in JeKo-1 and Mino cells.** Cells were incubated with indicated concentrations of SGI-1776 for 24 hr, and immunoblot analyses for Bcl-2, Bcl-X<sub>L</sub>, and XIAP were performed.

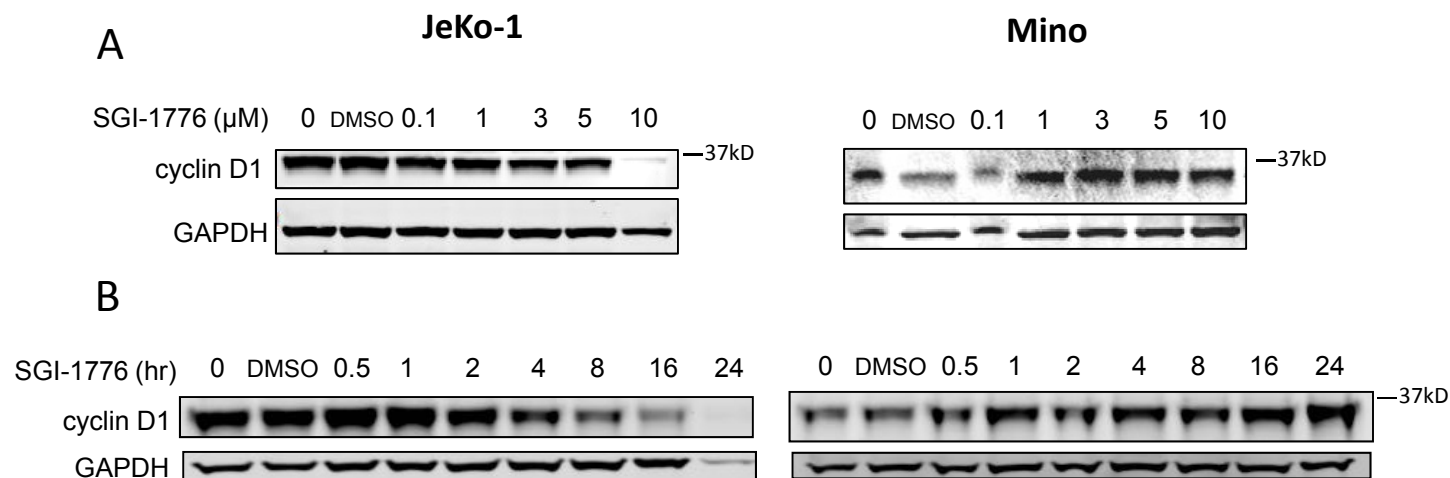

**Figure S2. Effects of SGI-1776 on cyclin D1 protein expression in JeKo-1 and Mino cells.**

Cells were incubated with the indicated concentrations for 24 hr (A), or time-points with 10  $\mu$ M SGI-1776 (B), and immunoblot analyses for cyclin D1 were performed in both sets of experiments.

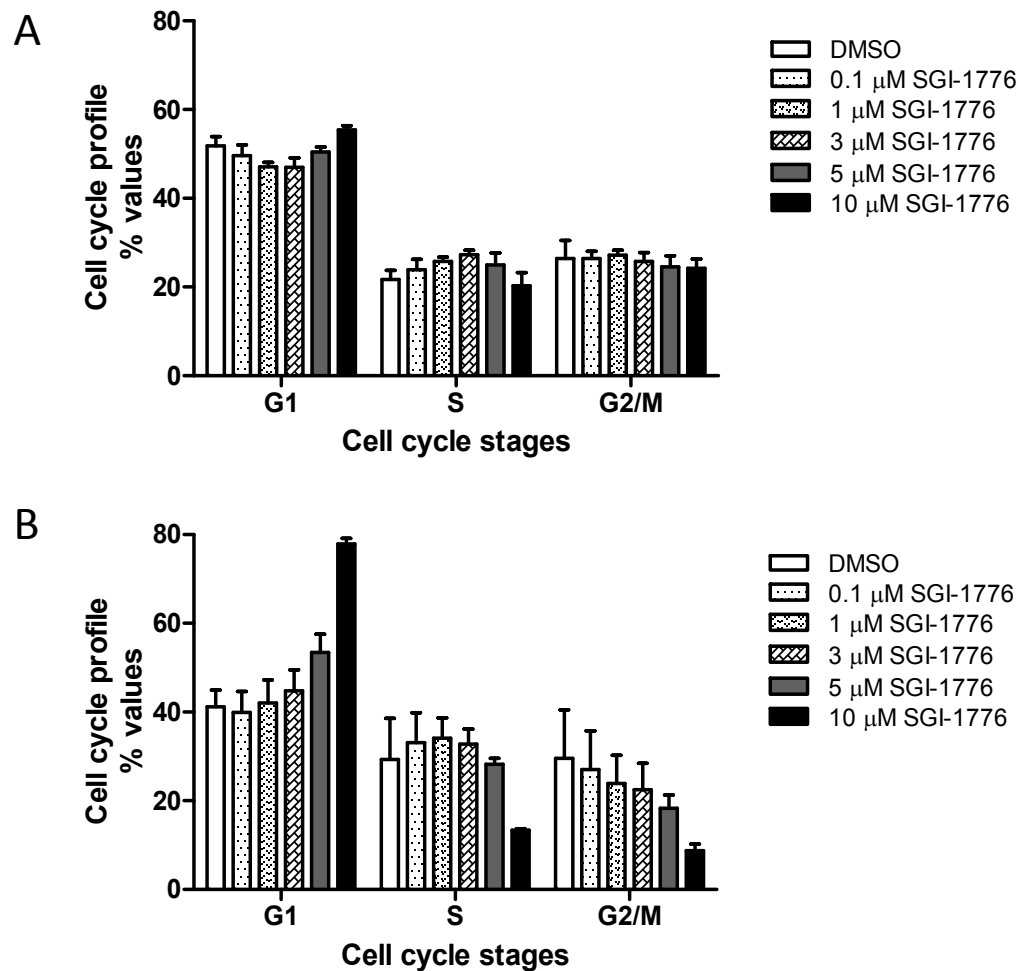

**Figure S3. Effects of SGI-1776 on cell cycle profiles in JeKo-1 and Mino cells.**

JeKo-1 (A) and Mino (B) cells were treated with indicated concentrations of SGI-1776 for 24 hr, stained with propidium iodide and analyzed for cell cycle distribution.

A

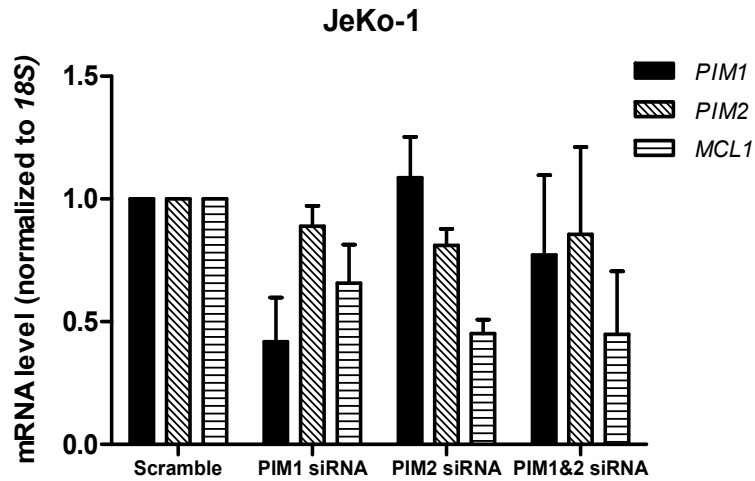

B

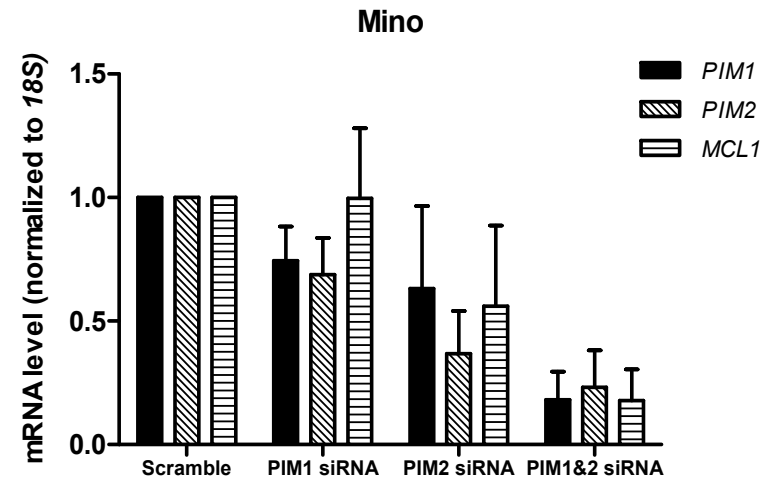

**Figure S4. Effects of *PIM1* and *PIM2* siRNA treatments on *PIM1*, *PIM2* and *MCL1* mRNA in JeKo-1 and Mino cells.**

JeKo-1 (A) and Mino (B) cells were treated with indicated siRNAs for 48hr, the expression levels of *PIM1*, *PIM2* and *MCL1* mRNA was measured using RT-PCR.
